# Supplementary material
Source: PubMed Central journal article supplement (PMC11028912)
Supplement: 262_2012_1346_MOESM1_ESM.pdf [file 262_2012_1346_MOESM1_ESM.pdf]

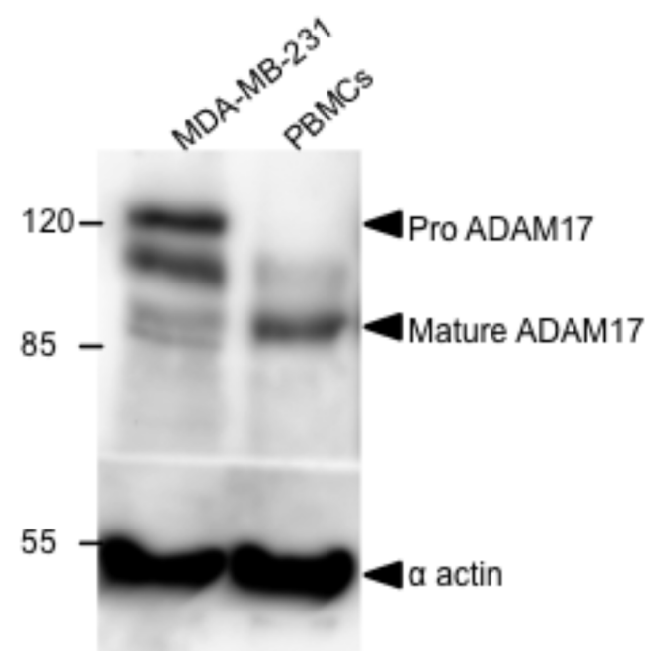

**Fig. S1: Western Blot analyses of MDA-MB-231 and PBMC cells**

Lysates containing a total protein concentration of 30  $\mu\text{g}$  were separated by 10 % SDS-PAGE and transferred to PVDF membrane. The PVDF membrane was incubated with 2  $\mu\text{g}/\text{ml}$  of anti-ADAM17 monoclonal antibody A300, following by horseradish peroxidase goat anti-mouse IgG (1:1000). Reaction was revealed by using ECL Plus detection reagents.
